# Supplementary material for: National and State Estimates of SELECT Trial Eligibility and Its Public Health Impact in the US
Source: PubMed Central journal article supplement (PMC11222994; doi:10.1001/jamanetworkopen.2024.20105), 2024-07-03
Supplement: jamanetwopen-e2420105-s001.pdf [file jamanetwopen-e2420105-s001.pdf]

## Data Sharing Statement

Erhabor. National and State Estimates of SELECT Trial Eligibility and Its Public Health Impact in the US. *JAMA Netw Open*. Published July 03, 2024.

doi:10.1001/jamanetworkopen.2024.20105

### Data

**Data available:** Yes

**Data types:** Deidentified participant data

**How to access data:** BRFSS

**When available:** With publication

### Supporting Documents

**Document types:** None

### Additional Information

**Who can access the data:** N/A

**Types of analyses:** N/A

**Mechanisms of data availability:** The data from the Behavioral Risk Factor Surveillance System (BRFSS) is available online.
